# Supplementary material
Source: PubMed Central journal article supplement (PMC2586698)
Supplement: neo1012_1481SD1.pdf [file neo1012_1481SD1.pdf]

**Table W1.** List of EMT-Related Genes.

| Gene Symbol                      | Name                                                                                    | Gene ID |
|----------------------------------|-----------------------------------------------------------------------------------------|---------|
| <i>Epithelial genes</i>          |                                                                                         |         |
| Actin cytoskeleton organization  |                                                                                         |         |
| <i>ARHGAP5</i>                   | Rho GTPase activating protein 5                                                         | 394     |
| <i>ARHGDI1A</i>                  | Rho GDP dissociation inhibitor (GDI) alpha                                              | 396     |
| <i>ARHGGEF1</i>                  | Rho guanine nucleotide exchange factor (GEF) 1                                          | 9138    |
| <i>DST</i>                       | Dystonin                                                                                | 667     |
| <i>FLNA</i>                      | Filamin A, alpha (actin binding protein 280)                                            | 2316    |
| <i>PODXL</i>                     | Podocalyxin-like                                                                        | 5420    |
| Apoptosis                        |                                                                                         |         |
| <i>CTNNA1</i>                    | Catenin (cadherin-associated protein), alpha-like 1                                     | 8727    |
| <i>MAP3K5</i>                    | Mitogen-activated protein kinase kinase kinase 5                                        | 4217    |
| <i>PRKCZ</i>                     | Protein kinase C, zeta                                                                  | 5590    |
| <i>SGK</i>                       | Serum/glucocorticoid-regulated kinase                                                   | 6446    |
| Cell adhesion and/or ECM-related |                                                                                         |         |
| <i>ANXA4</i>                     | Annexin A4                                                                              | 307     |
| <i>CD99</i>                      | CD99 molecule                                                                           | 4267    |
| <i>CDH1</i>                      | Cadherin 1, type 1, E-cadherin (epithelial)                                             | 999     |
| <i>CDH16</i>                     | Cadherin 16, KSP-cadherin                                                               | 1014    |
| <i>CLDN1</i>                     | Claudin 1                                                                               | 9076    |
| <i>CLDN7</i>                     | Claudin 7                                                                               | 1366    |
| <i>DSG2</i>                      | Desmoglein 2                                                                            | 1829    |
| <i>EVA1</i>                      | Epithelial V-like antigen 1                                                             | 10205   |
| <i>FBLN1</i>                     | filamin binding LIM protein 1                                                           | 54751   |
| <i>ILK</i>                       | Integrin-linked kinase                                                                  | 3611    |
| <i>ITGA3</i>                     | Integrin, alpha 3 (antigen CD49C, alpha 3 subunit of VLA-3 receptor)                    | 3675    |
| <i>ITGA5</i>                     | Integrin, alpha 5 (fibronectin receptor, alpha polypeptide)                             | 3678    |
| <i>ITGB1</i>                     | Integrin, beta 1                                                                        | 3688    |
| <i>ITGB5</i>                     | Integrin, beta 5                                                                        | 3693    |
| <i>ITGB6</i>                     | Integrin, beta 6                                                                        | 3694    |
| <i>JUP</i>                       | Junction plakoglobin                                                                    | 3728    |
| <i>KITLG</i>                     | KIT ligand                                                                              | 4254    |
| <i>LAMA3</i>                     | Laminin, alpha 3                                                                        | 3909    |
| <i>MAP17</i>                     | membrane-associated protein 17                                                          | 10158   |
| <i>NID2</i>                      | Nidogen 2 (osteonidogen)                                                                | 22795   |
| <i>NRP2</i>                      | Neuropilin 2                                                                            | 8828    |
| <i>OCLN</i>                      | Ocludin                                                                                 | 4950    |
| <i>PKP1</i>                      | Plakophilin 1 (ectodermal dysplasia/skin fragility syndrome)                            | 5317    |
| <i>SCRIB</i>                     | Scribbled homolog ( <i>Drosophila</i> )                                                 | 23513   |
| Cell cycle                       |                                                                                         |         |
| <i>CCND1</i>                     | Cyclin D1                                                                               | 595     |
| <i>CDK7</i>                      | Cyclin-dependent kinase 7 (MO15 homolog, <i>Xenopus laevis</i> , cdk-activating kinase) | 1022    |
| <i>DUSP1</i>                     | Dual specificity phosphatase 1                                                          | 1843    |
| <i>HDAC3</i>                     | Histone deacetylase 3                                                                   | 8841    |
| <i>MAFG</i>                      | V- <i>maf</i> musculoaponeurotic fibrosarcoma oncogene homolog G (avian)                | 4097    |
| <i>SFN</i>                       | Stratifin                                                                               | 2810    |
| <i>PLK2</i>                      | Polo-like kinase 2                                                                      | 10769   |
| <i>TOB2</i>                      | Transducer of ERBB2, 2                                                                  | 10766   |
| <i>YES1</i>                      | V-yes-1 Yamaguchi sarcoma viral oncogene homolog 1                                      | 7525    |
| Cell growth and/or maintenance   |                                                                                         |         |
| <i>ATPIA1</i>                    | ATPase, Na <sup>+</sup> /K <sup>+</sup> transporting, alpha 1 polypeptide               | 476     |
| <i>ATPIA3</i>                    | ATPase, Na <sup>+</sup> /K <sup>+</sup> transporting, alpha 3 polypeptide               | 478     |
| <i>ATPIB1</i>                    | ATPase, Na <sup>+</sup> /K <sup>+</sup> transporting, beta 1 polypeptide                | 481     |
| <i>BCL6</i>                      | B-cell CLL/lymphoma 6 (zinc finger protein 51)                                          | 604     |
| <i>BMP4</i>                      | Bone morphogenetic protein 4                                                            | 652     |
| <i>BPAG1</i>                     | Hemidesmosomal plaque protein                                                           | 667     |
| <i>BTG2</i>                      | BTG family, member 2                                                                    | 7832    |
| <i>CTGF</i>                      | Connective tissue growth factor                                                         | 1490    |
| <i>DAB2</i>                      | Disabled homolog 2, mitogen-responsive phosphoprotein ( <i>Drosophila</i> )             | 1601    |
| <i>DEFB1</i>                     | Defensin, beta 1                                                                        | 1672    |
| <i>FABP1</i>                     | Fatty acid binding protein 1, liver                                                     | 2168    |
| <i>FOS</i>                       | V- <i>fos</i> FBJ murine osteosarcoma viral oncogene homolog                            | 2353    |
| <i>FOSB</i>                      | FBJ murine osteosarcoma viral oncogene homolog B                                        | 2354    |
| <i>GAB1</i>                      | GRB2-associated binding protein 1                                                       | 2549    |
| <i>GC</i>                        | Group-specific component (vitamin D binding protein)                                    | 2638    |
| <i>GDI2</i>                      | GDP dissociation inhibitor 2                                                            | 2665    |
| <i>GPC3</i>                      | Glypican 3                                                                              | 2719    |

**Table W1.** (continued)

| Gene Symbol                        | Name                                                                                      | Gene ID |
|------------------------------------|-------------------------------------------------------------------------------------------|---------|
| <i>GRB7</i>                        | Growth factor receptor-bound protein 7                                                    | 2886    |
| <i>HBP17</i>                       | Fibroblast growth factor binding protein 1                                                | 9982    |
| <i>HDGF</i>                        | Hepatoma-derived growth factor (high-mobility group protein 1-like)                       | 3068    |
| <i>ITPR1</i>                       | Inositol 1,4,5-triphosphate receptor, type 1                                              | 3708    |
| <i>KRT14</i>                       | Keratin 14                                                                                | 3861    |
| <i>KRT19</i>                       | Keratin 19                                                                                | 3880    |
| <i>KRT8</i>                        | Keratin 8                                                                                 | 3856    |
| <i>MST1R</i>                       | Macrophage stimulating 1 receptor ( <i>c-met</i> -related tyrosine kinase)                | 4486    |
| <i>MUC1</i>                        | Mucin 1, cell surface associated                                                          | 4582    |
| <i>NET1</i>                        | Neuroepithelial cell transforming gene 1                                                  | 10276   |
| <i>NNT</i>                         | Nicotinamide nucleotide transhydrogenase                                                  | 23530   |
| <i>PROCR</i>                       | Protein C receptor, endothelial (EPCR)                                                    | 10544   |
| <i>PTPN1</i>                       | Protein tyrosine phosphatase, non-receptor type 1                                         | 5770    |
| <i>RARA</i>                        | Retinoic acid receptor, alpha                                                             | 5914    |
| <i>RGS2</i>                        | Regulator of G-protein signaling 2, 24 kDa                                                | 5997    |
| <i>SEMA3C</i>                      | Sema domain, immunoglobulin domain (Ig), short basic domain, secreted, (semaphorin) 3C    | 10512   |
| <i>SMARCC1</i>                     | SWI/SNF-related, matrix-associated                                                        | 6599    |
| <i>SRF</i>                         | Serum response factor ( <i>c-fos</i> serum response element-binding transcription factor) | 6722    |
| <i>STAT5A</i>                      | Signal transducer and activator of transcription 5A                                       | 6776    |
| <i>TACSTD1</i>                     | Tumor-associated calcium signal transducer 1                                              | 4072    |
| <i>TACSTD2</i>                     | Tumor-associated calcium signal transducer 2                                              | 4070    |
| <i>TCF3</i>                        | Transcription factor 3 (E2A immunoglobulin enhancer binding factors E12/E47)              | 6929    |
| <i>TGFB3</i>                       | Transforming growth factor, beta 3                                                        | 7043    |
| <i>TGM2</i>                        | Transglutaminase 2 (C polypeptide, protein-glutamine-gamma-glutamyltransferase)           | 7052    |
| <i>TJPI</i>                        | Tight junction protein 1 (zona occludens 1)                                               | 7082    |
| <i>TSC22D1</i>                     | TSC22 domain family, member 1                                                             | 8848    |
| <i>VAMP8</i>                       | Vesicle-associated membrane protein 8 (endobrevin)                                        | 8673    |
| Cell motility                      |                                                                                           |         |
| <i>ACTN4</i>                       | Actinin, alpha 4                                                                          | 81      |
| <i>F11R</i>                        | F11 receptor                                                                              | 50848   |
| <i>HMMR</i>                        | Hyaluronan-mediated motility receptor (RHAMM)                                             | 3161    |
| <i>JAG1</i>                        | Jagged 1 (Alagille syndrome)                                                              | 182     |
| <i>SERPINB5</i>                    | Serpin peptidase inhibitor, clade B (ovalbumin), member 5                                 | 5268    |
| <i>SPP1</i>                        | Secreted phosphoprotein 1 (osteopontin, bone sialoprotein I)                              | 6696    |
| <i>THBS1</i>                       | Thrombospondin 1                                                                          | 7057    |
| <i>TIAM1</i>                       | T-cell lymphoma invasion and metastasis 1                                                 | 7074    |
| Development and/or differentiation |                                                                                           |         |
| <i>DSP</i>                         | Desmoplakin                                                                               | 1832    |
| <i>EGR2</i>                        | Early growth response 2 (Krox-20 homolog, <i>Drosophila</i> )                             | 1959    |
| <i>FGF13</i>                       | Fibroblast growth factor 13                                                               | 2258    |
| <i>GATA3</i>                       | GATA binding protein 3                                                                    | 2625    |
| <i>GATA4</i>                       | GATA binding protein 4                                                                    | 2626    |
| <i>GATA6</i>                       | GATA binding protein 6                                                                    | 2627    |
| <i>HELLS</i>                       | Helicase, lymphoid-specific                                                               | 3070    |
| <i>HNF4A</i>                       | Hepatocyte nuclear factor 4, alpha                                                        | 3172    |
| <i>INHBB</i>                       | Inhibin, beta B (activin AB beta polypeptide)                                             | 3625    |
| <i>MITF</i>                        | Microphthalmia-associated transcription factor                                            | 4286    |
| <i>MSX2</i>                        | Msh homeobox 2                                                                            | 4488    |
| <i>NUMB</i>                        | Numb homolog ( <i>Drosophila</i> )                                                        | 8650    |
| <i>SCEL</i>                        | Sciellin                                                                                  | 8796    |
| <i>TCF4</i>                        | Transcription factor 4                                                                    | 6925    |
| <i>TCF6</i>                        | Transcription factor 6-like                                                               | 7019    |
| <i>TGIF</i>                        | TGFB-induced factor (TALE family homeobox)                                                | 7050    |
| Metabolism                         |                                                                                           |         |
| <i>AMD1</i>                        | Adenosylmethionine decarboxylase 1                                                        | 262     |
| <i>ATF3</i>                        | Activating transcription factor 3                                                         | 467     |
| <i>CA2</i>                         | Carbonic anhydrase II                                                                     | 760     |
| <i>CHKA</i>                        | Choline kinase alpha                                                                      | 1119    |
| <i>CITED2</i>                      | Cbp/p300-interacting transactivator, with Glu/Asp-rich carboxy-terminal domain, 2         | 10370   |
| <i>CTSH</i>                        | Cathepsin H                                                                               | 1512    |
| <i>CYP11A1</i>                     | Cytochrome P450, family 1, subfamily A, polypeptide 1                                     | 1543    |
| <i>EGR1</i>                        | Early growth response 1                                                                   | 1958    |
| <i>EXT1</i>                        | Exostosins (multiple) 1                                                                   | 2131    |

Table W1. (continued)

| Gene Symbol                      | Name                                                                                           | Gene ID |
|----------------------------------|------------------------------------------------------------------------------------------------|---------|
| <i>FBP2</i>                      | Fructose-1,6-bisphosphatase 2                                                                  | 8789    |
| <i>INMT</i>                      | Indolethylamine <i>N</i> -methyltransferase                                                    | 11185   |
| <i>IRF6</i>                      | Interferon regulatory factor 6                                                                 | 3664    |
| <i>KLF2</i>                      | Kruppel-like factor 2 (lung)                                                                   | 10365   |
| <i>LMO7</i>                      | LIM domain 7                                                                                   | 4008    |
| <i>NR4A1</i>                     | Nuclear receptor subfamily 4, group A, member 1                                                | 3164    |
| <i>PADI2</i>                     | Peptidyl arginine deiminase, type II                                                           | 11240   |
| <i>PC</i>                        | Pyruvate carboxylase                                                                           | 5091    |
| <i>PFTK1</i>                     | PFTAIRE protein kinase 1                                                                       | 5218    |
| <i>POLR2A</i>                    | Polymerase (RNA) II (DNA directed) polypeptide A, 220 kDa                                      | 5430    |
| <i>PTK9</i>                      | protein tyrosine kinase 9                                                                      | 5756    |
| <i>SERPINB6</i>                  | Serpin peptidase inhibitor, clade B (ovalbumin), member 6                                      | 5269    |
| <i>SFRS4</i>                     | Splicing factor, arginine/serine-rich 4                                                        | 6429    |
| <i>SP2</i>                       | Sp2 transcription factor                                                                       | 6668    |
| <i>TCF1</i>                      | Transcription factor 1, hepatic; LF-B1, hepatic nuclear factor (HNF1), albumin proximal factor | 6927    |
| <i>TCF2</i>                      | Transcription factor 2, hepatic; LF-B3; variant hepatic nuclear factor                         | 6928    |
| <i>TIMP3</i>                     | TIMP metalloproteinase inhibitor 3 (Sorsby fundus dystrophy, pseudoinflammatory)               | 7078    |
| <i>TJP2</i>                      | Tight junction protein 2 (zona occludens 2)                                                    | 9414    |
| <i>ZFP36</i>                     | Zinc finger protein 36, C3H type, homolog (mouse)                                              | 7538    |
| <i>ZNF239</i>                    | Zinc finger protein 239                                                                        | 8187    |
| <i>Mesenchymal genes</i>         |                                                                                                |         |
| Actin cytoskeleton organization  |                                                                                                |         |
| <i>ACTG1</i>                     | Actin, gamma 1                                                                                 | 71      |
| <i>ACTN1</i>                     | Actinin, alpha 1                                                                               | 87      |
| <i>CFL1</i>                      | Cofilin 1 (nonmuscle)                                                                          | 1072    |
| <i>CORO1C</i>                    | Coronin, actin binding protein, 1C                                                             | 23603   |
| <i>FLNB</i>                      | Filamin B, beta (actin binding protein 278)                                                    | 2317    |
| <i>PLEK2</i>                     | Pleckstrin 2                                                                                   | 26499   |
| <i>SDC1</i>                      | Syndecan 1                                                                                     | 6382    |
| <i>VIM</i>                       | Vimentin                                                                                       | 7431    |
| <i>WASPIP</i>                    | WAS/WASL interacting protein family, member 1                                                  | 7456    |
| Apoptosis                        |                                                                                                |         |
| <i>CASP9</i>                     | Caspase 9, apoptosis-related cysteine peptidase                                                | 842     |
| Cell adhesion and/or ECM-related |                                                                                                |         |
| <i>BGN</i>                       | Biglycan                                                                                       | 633     |
| <i>CD44</i>                      | CD44 molecule (Indian blood group)                                                             | 960     |
| <i>CDH15</i>                     | Cadherin 15, M-cadherin (myotubule)                                                            | 1013    |
| <i>CDH2</i>                      | Cadherin 2, type 1, N-cadherin                                                                 | 1000    |
| <i>CDH6</i>                      | Cadherin 6, type 2, K-cadherin (fetal kidney)                                                  | 1004    |
| <i>COL15A1</i>                   | Collagen, type XV, alpha 1                                                                     | 1306    |
| <i>COL1A2</i>                    | Collagen, type I, alpha 2                                                                      | 1278    |
| <i>COL5A1</i>                    | Collagen, type V, alpha 1                                                                      | 1289    |
| <i>COL5A2</i>                    | Collagen, type V, alpha 2                                                                      | 1290    |
| <i>COL6A1</i>                    | Collagen, type VI, alpha 1                                                                     | 1291    |
| <i>COL6A2</i>                    | Collagen, type VI, alpha 2                                                                     | 1292    |
| <i>CTNND1</i>                    | Catenin (cadherin-associated protein), delta 1                                                 | 1500    |
| <i>DDR2</i>                      | Discoidin domain receptor family, member 2                                                     | 4921    |
| <i>DLG5</i>                      | Discs, large homolog 5 ( <i>Drosophila</i> )                                                   | 9231    |
| <i>FN1</i>                       | Fibronectin 1                                                                                  | 2335    |
| <i>Lamb1</i>                     | Laminin, beta 1                                                                                | 3912    |
| <i>LGALS3</i>                    | Lectin, galactoside-binding, soluble, 3 (galectin 3)                                           | 3958    |
| <i>PTPNS1</i>                    | Protein tyrosine phosphatase, non-receptor type substrate 1                                    | 8194    |
| <i>TNC</i>                       | Tenascin C (hexabrachion)                                                                      | 3371    |
| <i>TNXB</i>                      | Tenascin XB                                                                                    | 7148    |
| <i>VCL</i>                       | Vinculin                                                                                       | 7414    |
| <i>VTN</i>                       | Vitronectin                                                                                    | 7448    |
| Cell cycle                       |                                                                                                |         |
| <i>ABL1</i>                      | <i>V-abl</i> Abelson murine leukemia viral oncogene homolog 1                                  | 25      |
| <i>AK1</i>                       | Adenylate kinase 1                                                                             | 203     |
| <i>BCL3</i>                      | B-cell CLL/lymphoma 3                                                                          | 602     |
| <i>BTG3</i>                      | BTG family, member 3                                                                           | 10950   |
| <i>CDC2</i>                      | Cell division cycle 2, G <sub>1</sub> to S and G <sub>2</sub> to M                             | 983     |
| <i>CDKN1A</i>                    | Cyclin-dependent kinase inhibitor 1A (p21, Cip1)                                               | 1026    |
| <i>CDKN2A</i>                    | Cyclin-dependent kinase inhibitor 2A (melanoma, p16, inhibits CDK4)                            | 1029    |

Table W1. (continued)

| Gene Symbol                    | Name                                                                           | Gene ID |
|--------------------------------|--------------------------------------------------------------------------------|---------|
| <i>CDKN2C</i>                  | Cyclin-dependent kinase inhibitor 2C (p18, inhibits CDK4)                      | 1031    |
| <i>GAS1</i>                    | Growth arrest-specific 1                                                       | 2619    |
| <i>PSEN2</i>                   | Presenilin 2 (Alzheimer disease 4)                                             | 5664    |
| Cell growth and/or maintenance |                                                                                |         |
| <i>ABCA9</i>                   | ATP-binding cassette, subfamily A (ABC1), member 9                             | 10350   |
| <i>ABCC11</i>                  | ATP-binding cassette, subfamily C (CFTR/MRP), member 11                        | 85320   |
| <i>AFP</i>                     | Alpha-fetoprotein                                                              | 174     |
| <i>BMP7</i>                    | Bone morphogenetic protein 7 (osteogenic protein 1)                            | 655     |
| <i>BSG</i>                     | Basigin (Ok blood group)                                                       | 682     |
| <i>CAV1</i>                    | Caveolin 1, caveolae protein, 22 kDa                                           | 857     |
| <i>CCK</i>                     | Cholecystokinin                                                                | 885     |
| <i>CCL2</i>                    | Chemokine (C-C motif) ligand 2                                                 | 6347    |
| <i>CCL8</i>                    | Chemokine (C-C motif) ligand 8                                                 | 6355    |
| <i>CD68</i>                    | CD68 molecule                                                                  | 968     |
| <i>CTGF</i>                    | Connective tissue growth factor                                                | 1490    |
| <i>CXCL1</i>                   | Chemokine (C-X-C motif) ligand 1 (melanoma growth stimulating activity, alpha) | 2919    |
| <i>CXCL5</i>                   | Chemokine (C-X-C motif) ligand 5                                               | 6374    |
| <i>CXCR7</i>                   | Chemokine (C-X-C motif) receptor 7                                             | 57007   |
| <i>EDG1</i>                    | Endothelial differentiation, sphingolipid G-protein-coupled receptor, 1        | 1901    |
| <i>EPS8</i>                    | Epidermal growth factor receptor pathway substrate 8                           | 2059    |
| <i>FZD1</i>                    | Frizzled homolog 1 ( <i>Drosophila</i> )                                       | 8321    |
| <i>FZD10</i>                   | Frizzled homolog 10 ( <i>Drosophila</i> )                                      | 11211   |
| <i>FZD2</i>                    | Frizzled homolog 2 ( <i>Drosophila</i> )                                       | 2535    |
| <i>FZD3</i>                    | Frizzled homolog 3 ( <i>Drosophila</i> )                                       | 7976    |
| <i>FZD4</i>                    | Frizzled homolog 4 ( <i>Drosophila</i> )                                       | 8322    |
| <i>FZD5</i>                    | Frizzled homolog 5 ( <i>Drosophila</i> )                                       | 7855    |
| <i>FZD6</i>                    | Frizzled homolog 6 ( <i>Drosophila</i> )                                       | 8323    |
| <i>FZD7</i>                    | Frizzled homolog 7 ( <i>Drosophila</i> )                                       | 8324    |
| <i>FZD8</i>                    | Frizzled homolog 8 ( <i>Drosophila</i> )                                       | 8325    |
| <i>FZD9</i>                    | Frizzled homolog 9 ( <i>Drosophila</i> )                                       | 8326    |
| <i>IF16</i>                    | Interferon, alpha-inducible protein 6                                          | 2537    |
| <i>GBP3</i>                    | Guanylate binding protein 3                                                    | 2635    |
| <i>GNAQ</i>                    | Guanine nucleotide binding protein (G protein), q polypeptide                  | 2776    |
| <i>GNG11</i>                   | Guanine nucleotide binding protein (G protein), gamma 11                       | 2791    |
| <i>GABBR2</i>                  | gamma-aminobutyric acid (GABA) B receptor, 2                                   | 9568    |
| <i>HGF</i>                     | Hepatocyte growth factor (hepatopoietin A; scatter factor)                     | 3082    |
| <i>HIF1</i>                    | Hypoxia-inducible factor 1                                                     | 3091    |
| <i>EPAS1</i>                   | Hypoxia-inducible factor 2                                                     | 2034    |
| <i>HMGA2</i>                   | High mobility group AT-hook 2                                                  | 8091    |
| <i>IGFBP1</i>                  | Insulin-like growth factor binding protein 1                                   | 3484    |
| <i>IGFBP3</i>                  | Insulin-like growth factor binding protein 3                                   | 3486    |
| <i>IGFBP4</i>                  | Insulin-like growth factor binding protein 4                                   | 3487    |
| <i>IGFBP5</i>                  | Insulin-like growth factor binding protein 5                                   | 3488    |
| <i>IL8RB</i>                   | Interleukin 8 receptor, beta                                                   | 3579    |
| <i>KIFAP3</i>                  | Kinesin-associated protein 3                                                   | 22920   |
| <i>MADH4</i>                   | SMAD family member 4                                                           | 4089    |
| <i>MEIS1</i>                   | Meis homeobox 1                                                                | 4211    |
| <i>MET</i>                     | Met proto-oncogene (hepatocyte growth factor receptor)                         | 4233    |
| <i>MYBBP1A</i>                 | MYB binding protein (P160) 1a                                                  | 10514   |
| <i>NTRK3</i>                   | Neurotrophic tyrosine kinase, receptor, type 3                                 | 4916    |
| <i>PCOLCE</i>                  | Procollagen C-endopeptidase enhancer                                           | 5118    |
| <i>PDGFA</i>                   | Platelet-derived growth factor alpha polypeptide                               | 5154    |
| <i>PDGFRA</i>                  | Platelet-derived growth factor receptor, alpha polypeptide                     | 5156    |
| <i>PDGFRB</i>                  | Platelet-derived growth factor receptor, beta polypeptide                      | 5159    |
| <i>PHGDH</i>                   | Phosphoglycerate dehydrogenase                                                 | 26227   |
| <i>PKC</i>                     | Paroxysmal kinesigenic choreoathetosis                                         | 50818   |
| <i>PMP22</i>                   | Peripheral myelin protein 22                                                   | 5376    |
| <i>PTH1LH</i>                  | Parathyroid hormone-like hormone                                               | 5744    |
| <i>PTPN22</i>                  | Protein tyrosine phosphatase, non-receptor type 22 (lymphoid)                  | 26191   |
| <i>PTPN7</i>                   | Protein tyrosine phosphatase, non-receptor type 7                              | 5778    |

Table W1. (continued)

| Gene Symbol                        | Name                                                                                    | Gene ID |
|------------------------------------|-----------------------------------------------------------------------------------------|---------|
| <i>PTPRM</i>                       | Protein tyrosine phosphatase, receptor type, M                                          | 5797    |
| <i>REL</i>                         | V- <i>rel</i> reticuloendotheliosis viral oncogene homolog (avian)                      | 5966    |
| <i>RRAS</i>                        | Related RAS viral ( <i>r-ras</i> ) oncogene homolog                                     | 6237    |
| <i>SLC29A1</i>                     | Solute carrier family 29 (nucleoside transporters), member 1                            | 2030    |
| <i>SRC</i>                         | V- <i>src</i> sarcoma (Schmidt-Ruppin A-2) viral oncogene homolog (avian)               | 6714    |
| <i>STAT1</i>                       | Signal transducer and activator of transcription 1, 91 kDa                              | 6772    |
| <i>TCF3</i>                        | Transcription factor 3 (E2A immunoglobulin enhancer binding factors E12/E47)            | 6929    |
| <i>TCF8</i>                        | Transcription factor 8 (represses interleukin 2 expression)                             | 6935    |
| <i>TGFB1</i>                       | Transforming growth factor, beta 1 (Camurati-Engelmann disease)                         | 7040    |
| <i>TIEG</i>                        | Kruppel-like factor 10                                                                  | 7071    |
| <i>TLN1</i>                        | Talin 1                                                                                 | 7094    |
| <i>TSPAN-3</i>                     | tetraspanin 3                                                                           | 10099   |
| <i>TUBA6</i>                       | Tubulin, alpha 6                                                                        | 84790   |
| Cell motility                      |                                                                                         |         |
| <i>ACTB</i>                        | Actin, beta                                                                             | 60      |
| <i>C4A</i>                         | complement component 4A                                                                 | 720     |
| <i>CALD1</i>                       | Caldesmon 1                                                                             | 800     |
| <i>CTSB</i>                        | Cathepsin B                                                                             | 1508    |
| <i>CTSZ</i>                        | Cathepsin Z                                                                             | 1522    |
| <i>GRN</i>                         | Granulin                                                                                | 2896    |
| <i>MMP10</i>                       | Matrix metallopeptidase 10 (stromelysin 2)                                              | 4319    |
| <i>MMP12</i>                       | Matrix metallopeptidase 12 (macrophage elastase)                                        | 4321    |
| <i>MMP13</i>                       | Matrix metallopeptidase 13 (collagenase 3)                                              | 4322    |
| <i>MMP2</i>                        | Matrix metallopeptidase 2 (gelatinase A, 72 kDa gelatinase, 72 kDa type IV collagenase) | 4313    |
| <i>MMP7</i>                        | Matrix metallopeptidase 7 (matrilysin, uterine)                                         | 4316    |
| <i>MMP9</i>                        | Matrix metallopeptidase 9 (gelatinase B, 92 kDa gelatinase, 92 kDa type IV collagenase) | 4318    |
| <i>MSN</i>                         | Moesin                                                                                  | 4478    |
| <i>NOTCH2</i>                      | Notch homolog 2 ( <i>Drosophila</i> )                                                   | 4853    |
| <i>PLA2G7</i>                      | Phospholipase A2, group VII (platelet-activating factor acetylhydrolase, plasma)        | 7941    |
| <i>PLAU</i>                        | Plasminogen activator, urokinase                                                        | 5328    |
| <i>PLAUR</i>                       | Plasminogen activator, urokinase receptor                                               | 5329    |
| <i>S100A2</i>                      | S100 calcium binding protein A2                                                         | 6273    |
| <i>S100A3</i>                      | S100 calcium binding protein A3                                                         | 6274    |
| <i>S100A4</i>                      | S100 calcium binding protein A4                                                         | 6275    |
| <i>S100A6</i>                      | S100 calcium binding protein A6                                                         | 6277    |
| <i>S100A8</i>                      | S100 calcium binding protein A8                                                         | 6279    |
| <i>S100P</i>                       | S100 calcium binding protein P                                                          | 6286    |
| <i>SERPINH1</i>                    | Serp peptidase inhibitor, clade H (heat shock protein 47), member 1                     | 871     |
| <i>TIMP1</i>                       | TIMP metallopeptidase inhibitor 1                                                       | 7076    |
| Development and/or differentiation |                                                                                         |         |
| <i>COL3A1</i>                      | Collagen, type III, alpha 1 (Ehlers-Danlos syndrome type IV, autosomal dominant)        | 1281    |
| <i>CYP1B1</i>                      | Cytochrome P450, family 1, subfamily B, polypeptide 1                                   | 1545    |
| <i>DCN</i>                         | Decorin                                                                                 | 1634    |
| <i>FGF19</i>                       | Fibroblast growth factor 19                                                             | 9965    |
| <i>FLOT1</i>                       | Flotillin 1                                                                             | 10211   |
| <i>ID1</i>                         | Inhibitor of DNA binding 1, dominant negative helix-loop-helix protein                  | 3397    |
| <i>ID3</i>                         | Inhibitor of DNA binding 3, dominant negative helix-loop-helix protein                  | 3399    |
| <i>ID4</i>                         | Inhibitor of DNA binding 4, dominant negative helix-loop-helix protein                  | 3400    |
| <i>IL11</i>                        | Interleukin 11                                                                          | 3589    |
| <i>INHBA</i>                       | Inhibin, beta A (activin A, activin AB alpha polypeptide)                               | 3624    |
| <i>ISL2</i>                        | ISL2 transcription factor, LIM/homeodomain, (islet-2)                                   | 64843   |
| <i>LDB2</i>                        | LIM domain binding 2                                                                    | 9079    |
| <i>LUM</i>                         | Lumican                                                                                 | 4060    |
| <i>NEUROD4</i>                     | Neurogenic differentiation 4                                                            | 58158   |
| <i>SNAI1</i>                       | Snail homolog 1 ( <i>Drosophila</i> )                                                   | 6615    |
| <i>SNAI2</i>                       | Snail homolog 2 ( <i>Drosophila</i> )                                                   | 6591    |
| <i>SPARC</i>                       | Secreted protein, acidic, cysteine-rich (osteonectin)                                   | 6678    |
| <i>SPRR1A</i>                      | Small proline-rich protein 1A                                                           | 6698    |

Table W1. (continued)

| Gene Symbol                | Name                                                                                       | Gene ID |
|----------------------------|--------------------------------------------------------------------------------------------|---------|
| <i>TCF4</i>                | Transcription factor 4                                                                     | 6925    |
| <i>TLE1</i>                | Transducin-like enhancer of split 1 (E(sp1) homolog, <i>Drosophila</i> )                   | 7088    |
| <i>TWIST1</i>              | twist homolog 1                                                                            | 7291    |
| <i>TWIST2</i>              | twist homolog 2                                                                            | 117581  |
| <i>WNT5A</i>               | Wingless-type MMTV integration site family, member 5A                                      | 7474    |
| <i>WNT5B</i>               | Wingless-type MMTV integration site family, member 5B                                      | 81029   |
| Metabolism                 |                                                                                            |         |
| <i>ACVR1</i>               | Activin A receptor, type I                                                                 | 90      |
| <i>ADSS</i>                | Adenylosuccinate synthase                                                                  | 159     |
| <i>AK3</i>                 | Adenylate kinase 3                                                                         | 50808   |
| <i>ASNS</i>                | Asparagine synthetase                                                                      | 440     |
| <i>BHLHB2</i>              | Basic helix-loop-helix domain containing, class B, 2                                       | 8553    |
| <i>CD63</i>                | CD63 molecule                                                                              | 967     |
| <i>FDP5</i>                | Farnesyl diphosphate synthase                                                              | 2224    |
| <i>FKBP14</i>              | FK506 binding protein 14, 22 kDa                                                           | 55033   |
| <i>FMO1</i>                | Flavin containing monooxygenase 1                                                          | 2326    |
| <i>GALK1</i>               | Galactokinase 1                                                                            | 2584    |
| <i>HSPG2</i>               | Heparan sulfate proteoglycan 2 (perlecan)                                                  | 3339    |
| <i>INSL6</i>               | Insulin-like 6                                                                             | 11172   |
| <i>MTHFD2</i>              | Methylenetetrahydrofolate dehydrogenase (NADP <sup>+</sup> dependent) 2                    | 10797   |
| <i>NME2</i>                | Nonmetastatic cells 2, protein                                                             | 4831    |
| <i>PCK1</i>                | Phosphoenolpyruvate carboxykinase 1 (soluble)                                              | 5105    |
| <i>PTGIS</i>               | Prostaglandin I2 (prostacyclin) synthase                                                   | 5740    |
| <i>PTGS1</i>               | Prostaglandin-endoperoxide synthase 1 (prostaglandin G/H synthase and cyclooxygenase)      | 5742    |
| <i>PTGS2</i>               | Prostaglandin-endoperoxide synthase 2 (prostaglandin G/H synthase and cyclooxygenase)      | 5743    |
| <i>RPS24</i>               | Ribosomal protein S24                                                                      | 6229    |
| <i>SLC3A2</i>              | Solute carrier family 3 (activators of dibasic and neutral amino acid transport), member 2 | 6520    |
| <i>SRM</i>                 | Spermidine synthase                                                                        | 6723    |
| <i>VLDLR</i>               | Very low density lipoprotein receptor                                                      | 7436    |
| <i>ZNF275</i>              | Zinc finger protein 275                                                                    | 10838   |
| Biological process unknown |                                                                                            |         |
| <i>ISG15</i>               | ISG15 ubiquitin-like modifier                                                              | 9636    |
| <i>PSTPIP2</i>             | Proline-serine-threonine phosphatase interacting protein 2                                 | 9050    |
| <i>UPPI</i>                | Uridine phosphorylase 1                                                                    | 7378    |
